# Supplementary material
Source: PubMed Central journal article supplement (PMC2878570)
Supplement: supp_M110.114371_jbc.M110.114371-1.pdf [file supp_M110.114371_jbc.M110.114371-1.pdf]

**Supplementary Fig. 1:** pH and PalH independent signalling in a strain overexpressing PalF-HA3-Ub compared to its wild-type control overexpressing PalF-HA3. Cells were cultured at acid pH before being shifted to alkaline pH. In the PalF-HA3 strain, processing is strictly dependent on alkaline pH and PalH. In the PalF-HA3-Ub strain, significant processing takes place at acidic pH even in the absence of PalH.

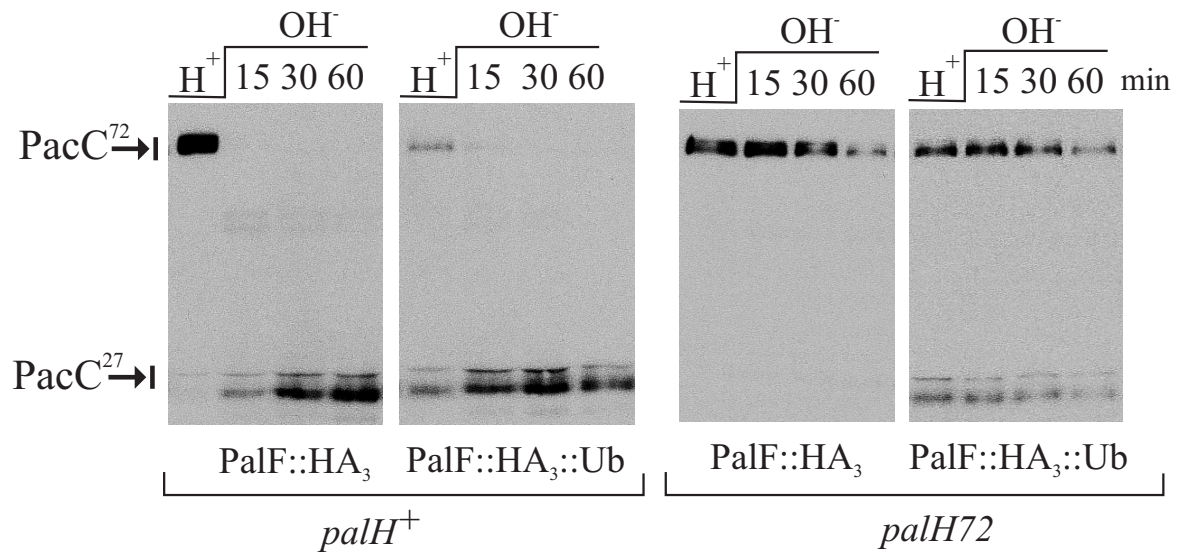

**Supplementary Table I: Detailed genotypes of strains used in this work**

| strain number | complete genotype                                                                                                                         |
|---------------|-------------------------------------------------------------------------------------------------------------------------------------------|
| MAD1288       | <i>palH72; argB2[argB*-alcA<sup>P</sup>::palH::gfp]; pyroA4; pantoB100</i>                                                                |
| MAD1315       | <i>wA2; inoB2; paC900</i>                                                                                                                 |
| MAD1348       | <i>pabaA1 palH72 yA2; inoB2; pacC900</i>                                                                                                  |
| MAD1730       | <i>pyroA4 inoB2 ΔnkuA; pacC900</i>                                                                                                        |
| MAD1732       | <i>pyrG89; wA4; inoB2 pyroA4; pacC900</i>                                                                                                 |
| MAD2226       | <i>pabaA1 yA2; palC::gfp-pyrG<sup>fum</sup>; palF15</i>                                                                                   |
| MAD2227       | <i>yA2; palC::gfp-pyrG<sup>fum</sup>; palF15</i>                                                                                          |
| MAD2228       | <i>yA2; palC::gfp-pyrG<sup>fum</sup>; pantoB100</i>                                                                                       |
| MAD2352       | <i>pyrG89; wA4; inoB2 ΔnkuA pyroA4; pacC900; palF::HA<sub>3</sub>-pyrG<sup>fum</sup></i>                                                  |
| MAD2353       | <i>pyrG89; wA4; inoB2 ΔnkuA pyroA4; pacC900; palF::HA<sub>3</sub>::Ub-pyrG<sup>fum</sup></i>                                              |
| MAD2356       | <i>pyrG89; wA4; inoB2 pyroA4 ΔnkuA; pacC900; palF::HA<sub>3</sub>::Ub<sup>K48R</sup>-pyrG<sup>fum</sup></i>                               |
| MAD2359       | <i>palH72; argB2::[argB*-alcA<sup>P</sup>::palH::gfp]; pyroA4::[pyroA*-alcA<sup>P</sup>::palF::FLAG]; pantoB100</i>                       |
| MAD2376       | <i>wA4; argB2::[argB*-alcA<sup>P</sup>::palH::gfp]; pyroA4; pantoB100</i>                                                                 |
| MAD2486       | <i>inoB2 ΔnkuA pyroA4::[pyroA*-gpdA<sup>mini</sup>::palF::HA<sub>3</sub>]; pacC900</i>                                                    |
| MAD2491       | <i>inoB2 ΔnkuA pyroA4::[pyroA*-gpdA<sup>mini</sup>::palF::HA<sub>3</sub>::Ub]; pacC900</i>                                                |
| MAD2493       | <i>inoB2 ΔnkuA pyroA4::[pyroA*-gpdA<sup>mini</sup>::palF::HA<sub>3</sub>::Ub<sup>K48R</sup>]; pacC900</i>                                 |
| MAD2705       | <i>palH72; ΔnkuA pyroA4::[pyroA*-gpdA<sup>mini</sup>::palF::HA<sub>3</sub>]; pacC900</i>                                                  |
| MAD2714       | <i>palH72; inoB2 ΔnkuA pyroA4::[pyroA*-gpdA<sup>mini</sup>::palF::HA<sub>3</sub>::Ub]; pacC900</i>                                        |
| MAD2720       | <i>palH72; pyroA4::[pyroA*-gpdA<sup>mini</sup>::palF::HA<sub>3</sub>::Ub<sup>K48R</sup>]; pacC900</i>                                     |
| MAD2845       | <i>pyrG89?; inoB2 palC::gfp-pyrG<sup>fum</sup> pyroA4::[pyroA*-gpdA<sup>mini</sup>::palF::HA<sub>3</sub>]; pacC900?</i>                   |
| MAD2846       | <i>pyrG89? palC::gfp-pyrG<sup>fum</sup> pyroA4::[pyroA*-gpdA<sup>mini</sup>::palF::HA<sub>3</sub>]; pacC900?</i>                          |
| MAD2488       | <i>pyrG89? inoB2 palC::gfp-pyrG<sup>fum</sup> pyroA4::[pyroA*-gpdA<sup>mini</sup>::palF::HA<sub>3</sub>::Ub<sup>K48R</sup>]; pacC900?</i> |
| MAD2489       | <i>pyrG89? palC::gfp-pyrG<sup>fum</sup> pyroA4::[pyroA*-gpdA<sup>mini</sup>::palF::HA<sub>3</sub>::Ub<sup>K48R</sup>]; pacC900?</i>       |
| MAD2996       | <i>palH72; argB2[argB*-alcA<sup>P</sup>::palH::gfp]; pyroA4::[pyroA*-alcA<sup>P</sup>::palF-HA<sub>3</sub>]; pantoB100</i>                |
| MAD3014       | <i>palH72 pyrG89? pabaA1; wA; inoB2 ΔnkuA? pacC900; palF:HA<sub>3</sub>::pyrG<sup>fum</sup></i>                                           |
| MAD3023       | <i>pyrG89?; palC::gfp-pyrG<sup>fum</sup> pyroA4; pacC900?</i>                                                                             |
